# Supplementary material for: Realising the electrochemical stability of graphene: scalable synthesis of an ultra-durable platinum catalyst for the oxygen reduction reaction
Source: Royal Society of Chemistry journal article supplement (doi:10.1039/d0nr03326j), 2020-01-01
Supplement: d0nr03326j1.pdf [file d0nr03326j1.pdf]

## Supporting Information

### Realising the Electrochemical Stability of Graphene: Scalable Synthesis of an Ultra-durable Platinum Catalyst for the Oxygen Reduction Reaction

*Gyen Ming A. Angel, Noramalina Mansor, Rhodri Jervis, Zahra Rana, Chris Gibbs, Andrew Seel, Alexander F.R. Kilpatrick, Paul R. Shearing, Christopher A. Howard, Dan J. L. Brett\*, Patrick L. Cullen\**

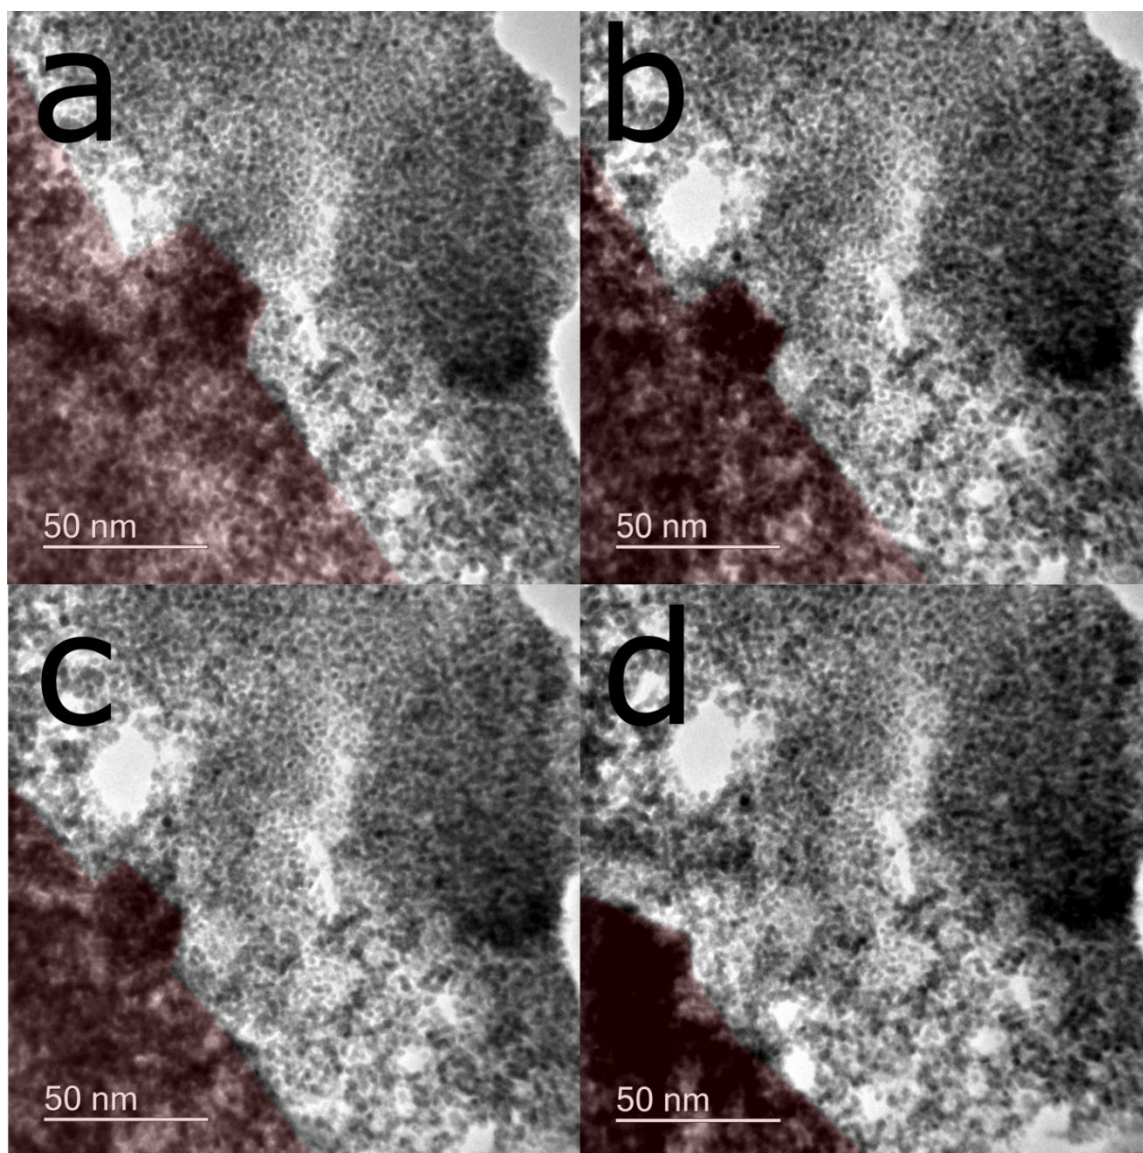

**Figure S1 a,b,c,d** sequential TEM images showing one sheet of GD-Pt/G (masked in red) moving over an underlying GD-Pt/G sheet in the electron beam

Raman sample preparation:  $\text{KC}_{24}(\text{NH}_3)_{1.3}$  powder was loaded into a 1 mm borosilicate glass capillary within the glovebox, and then sealed with wax to ensure it remained air-free. Graphenide-derived platinum nanoparticle/graphene componsite (GD-Pt/G)

samples were obtained from solution via drop-casting onto glass slides which were then dried overnight in ambient conditions. All Raman spectra were obtained on a Renishaw InVia Microscope using a 488 nm laser and a 2400 l/mm diffraction grating. All spectra are normalised to the G-peak of each sample.

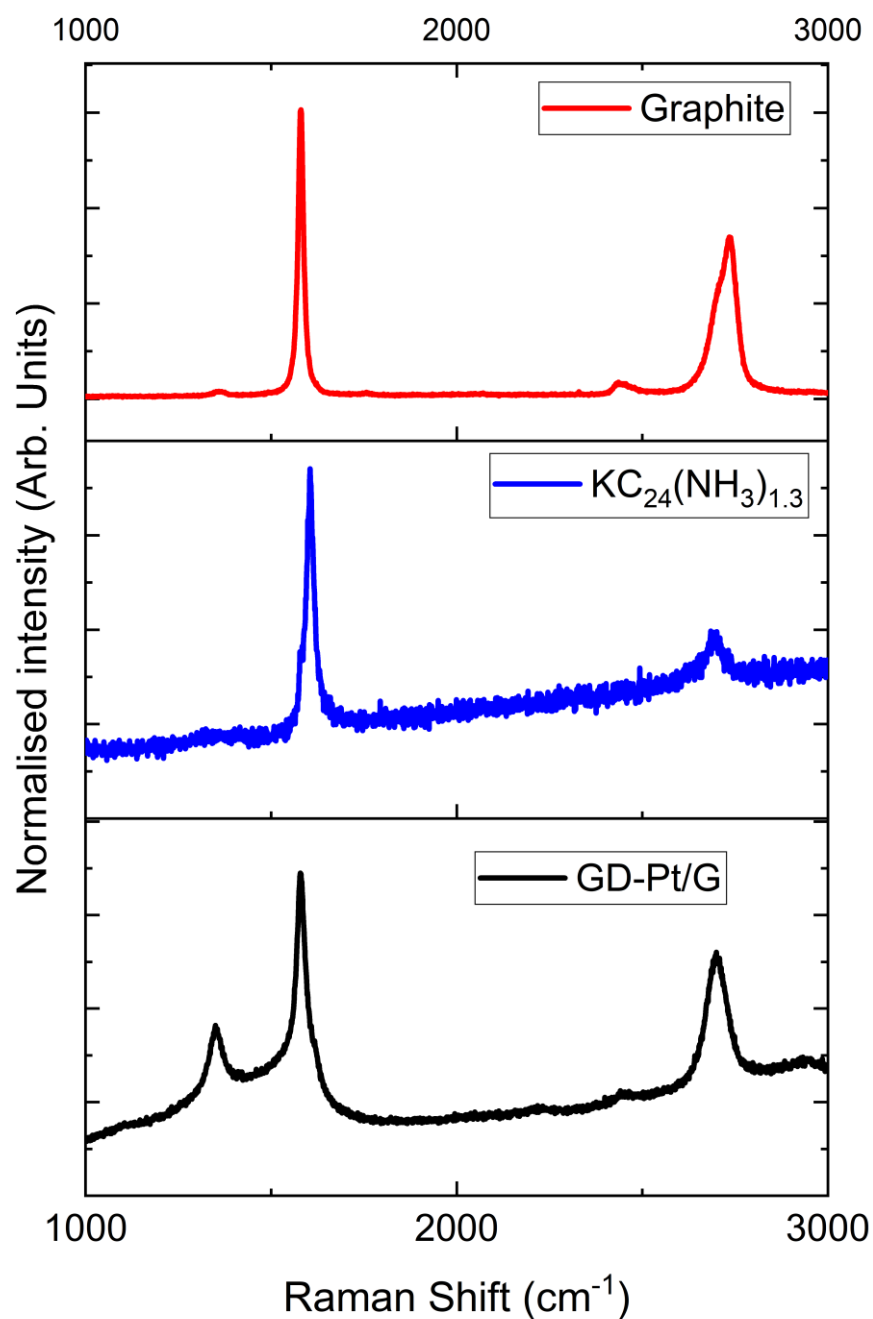

**Figure S2** Raman spectra of the starting graphite, the KC<sub>24</sub>(NH<sub>3</sub>)<sub>1.3</sub> GIC and GD-Pt/G.

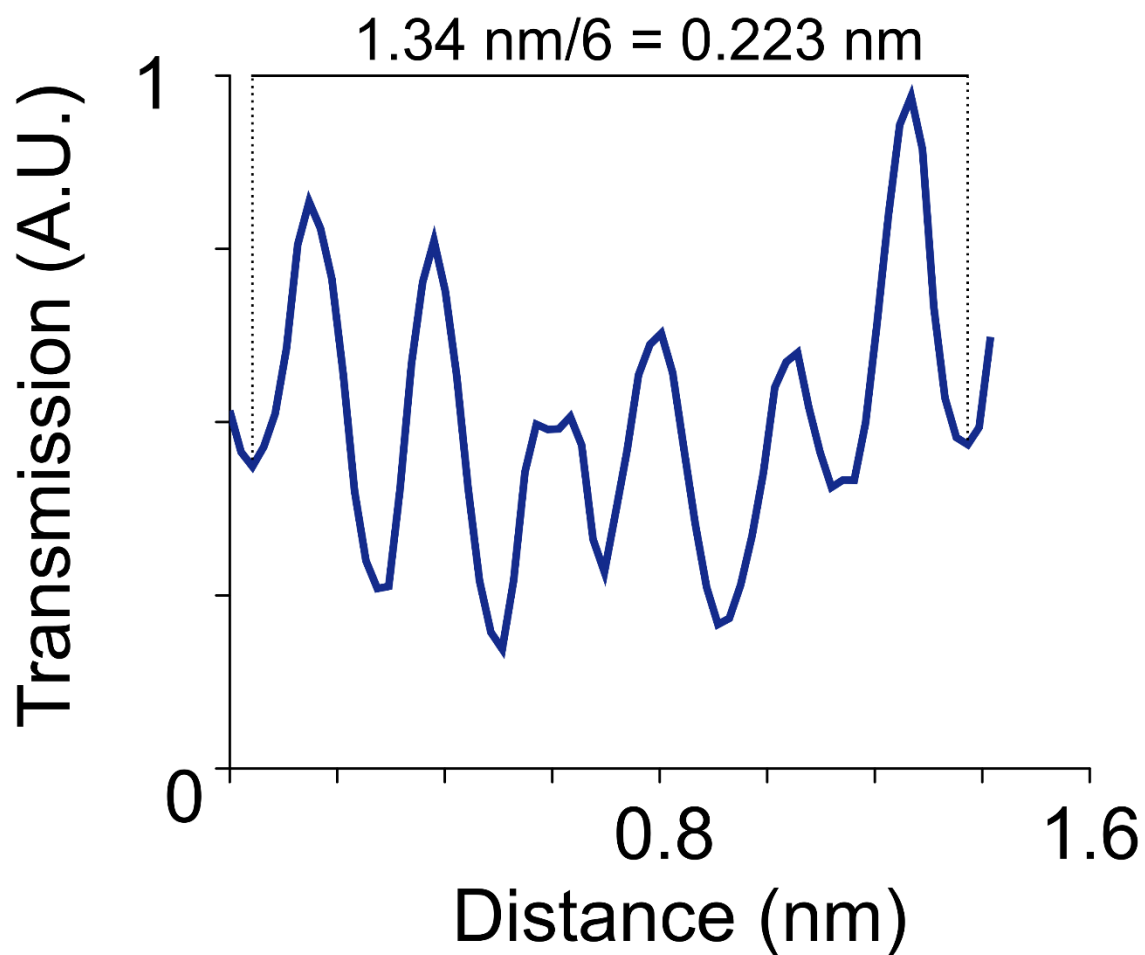

**Figure S3** Line profile of platinum nanoparticle planes, visible in main text Figure 2a. The distance measured across seven planes was found to be ca. 1.34 nm, resulting in an interplanar distance of 0.223 nm. This corresponds with the (111) Pt interplanar spacing.

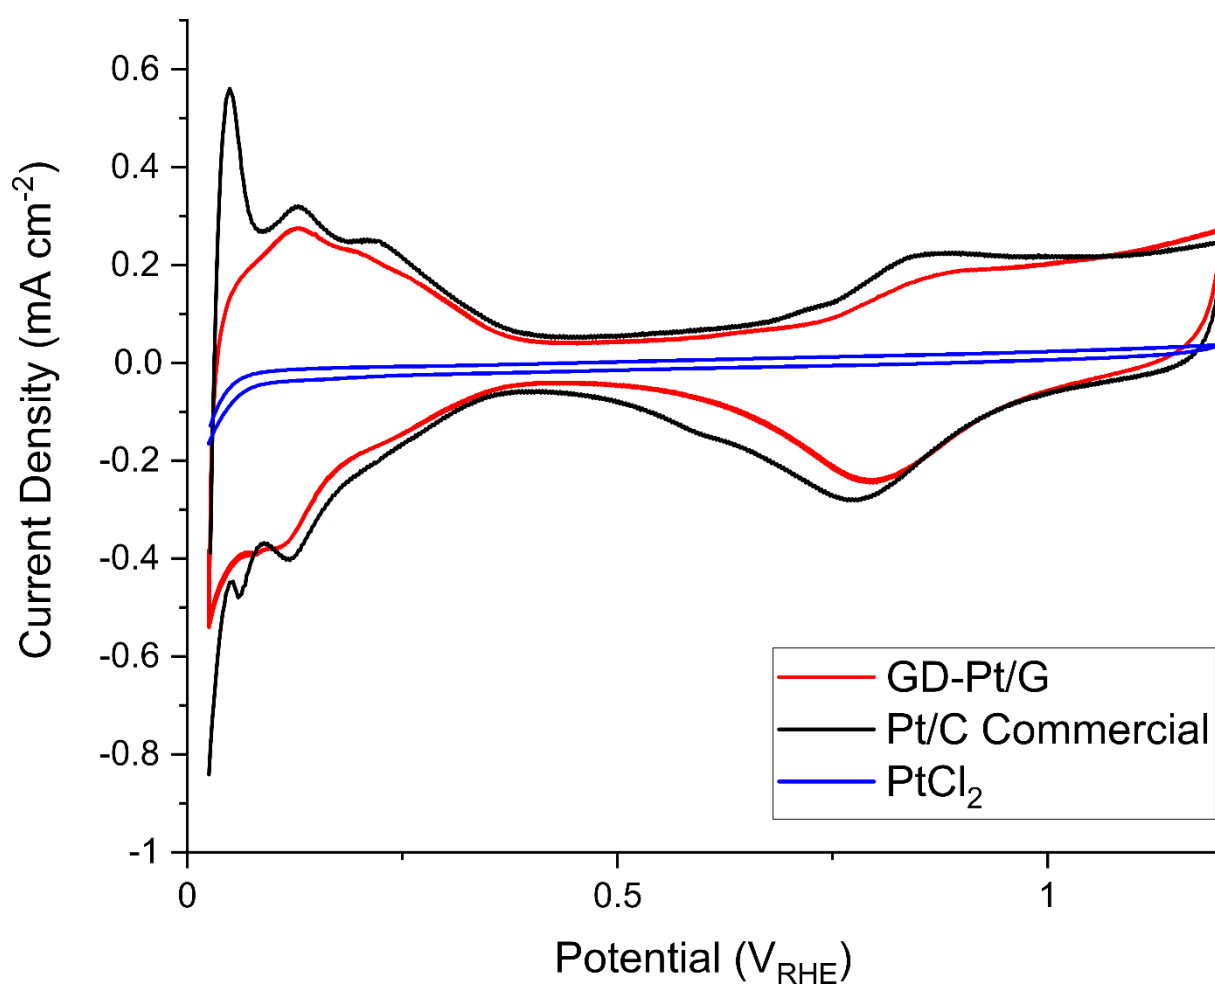

**Figure S4** Cyclic voltammograms of GD-Pt/G and commercial Pt/C electrodes, in  $\text{N}_2$  saturated 0.1M  $\text{HClO}_4$ , scan rate  $20 \text{ mV s}^{-1}$ .

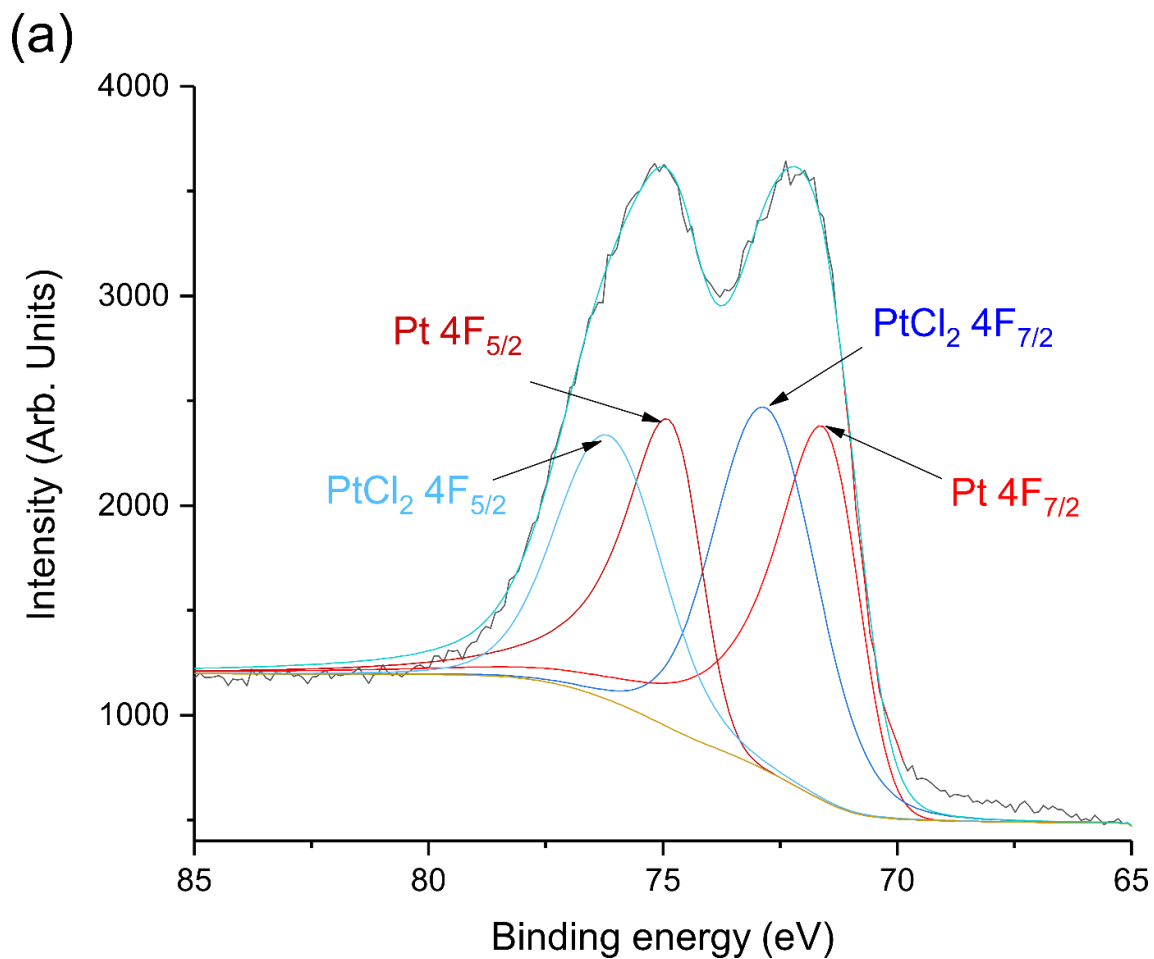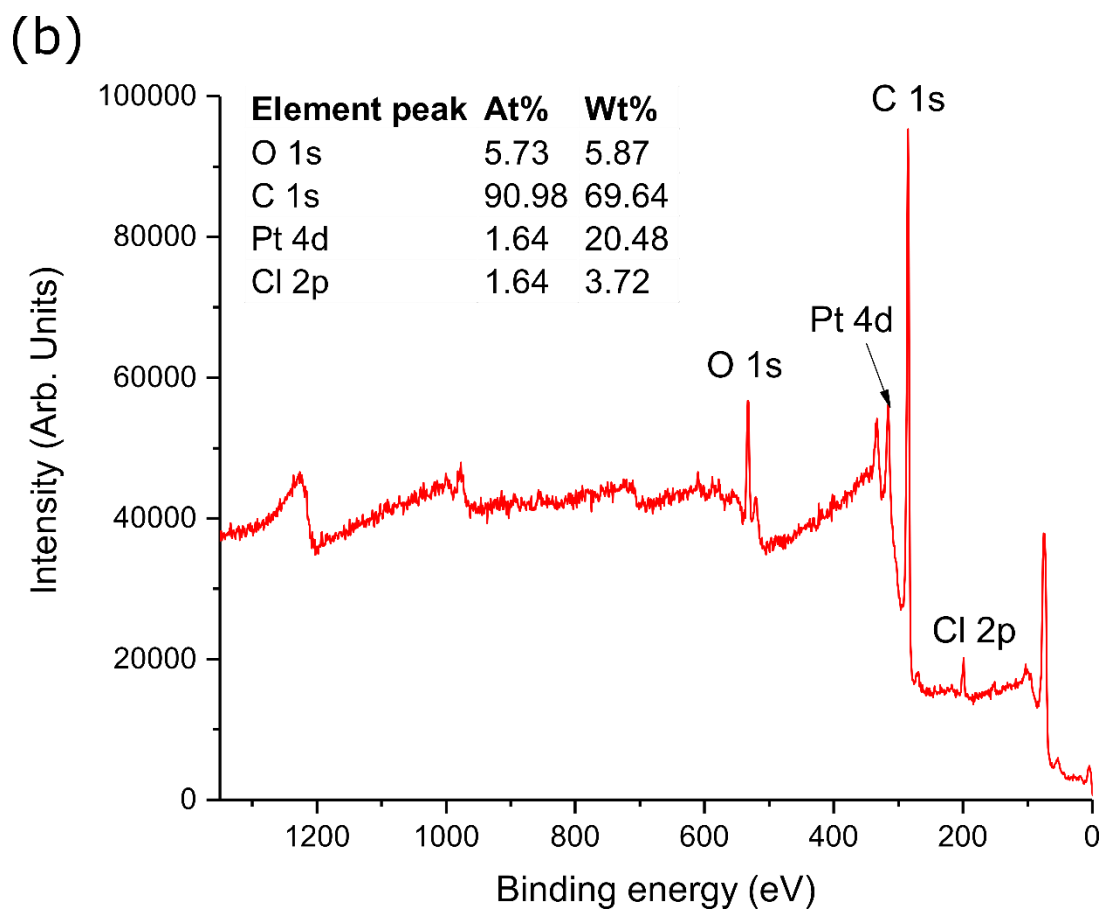

**Figure S5 (a)** XPS high resolution scan of the Pt 4F region of GD-Pt/G powder. The peaks can be deconvoluted into a combination of platinum and platinum chloride peaks, with quantification suggesting a 50:50 mixture of platinum and unreacted platinum chloride, consistent with the At% obtained from the quantification of the survey XPS spectrum. **Figure S5 (b)** XPS Survey spectrum of GD-Pt/G powder with elemental quantification table inset. Quantification of the spectrum, used in combination with the high resolution Pt 4F scan, suggests that GD-Pt/G has a Pt loading weight of 11.5 wt%

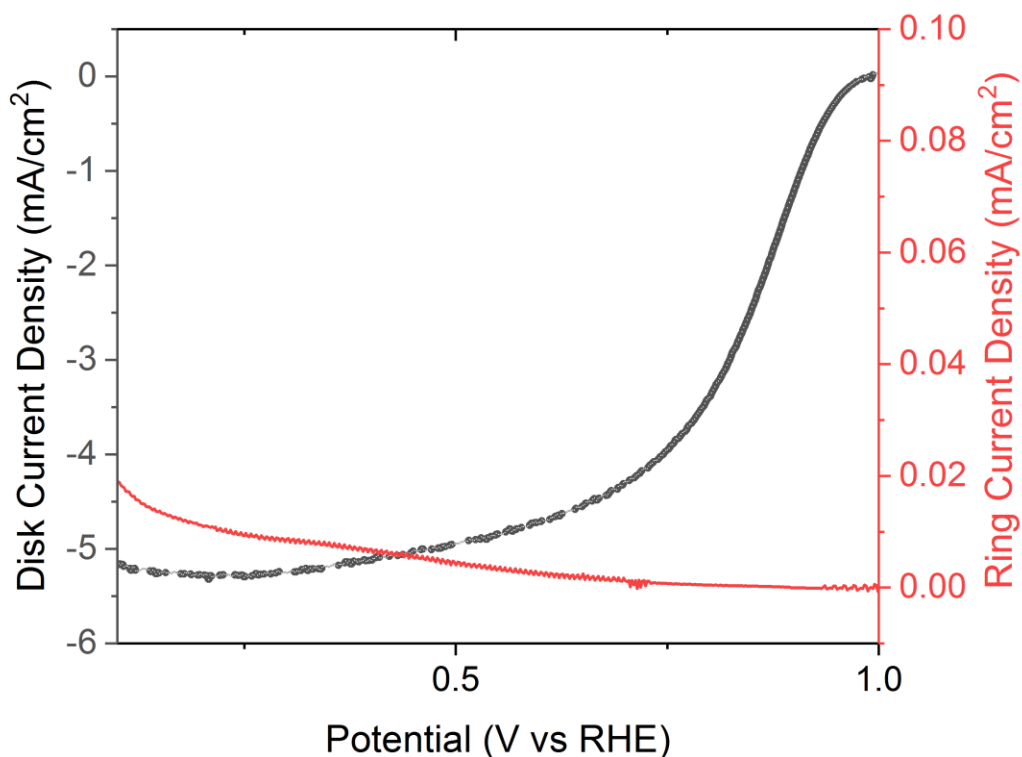

**Figure S6** Linear sweep voltammogram obtained using a rotating ring-disk experiment for GD-Pt/G. This was performed in  $\text{HClO}_4$  at a scan rate of  $20 \text{ mV s}^{-1}$ .

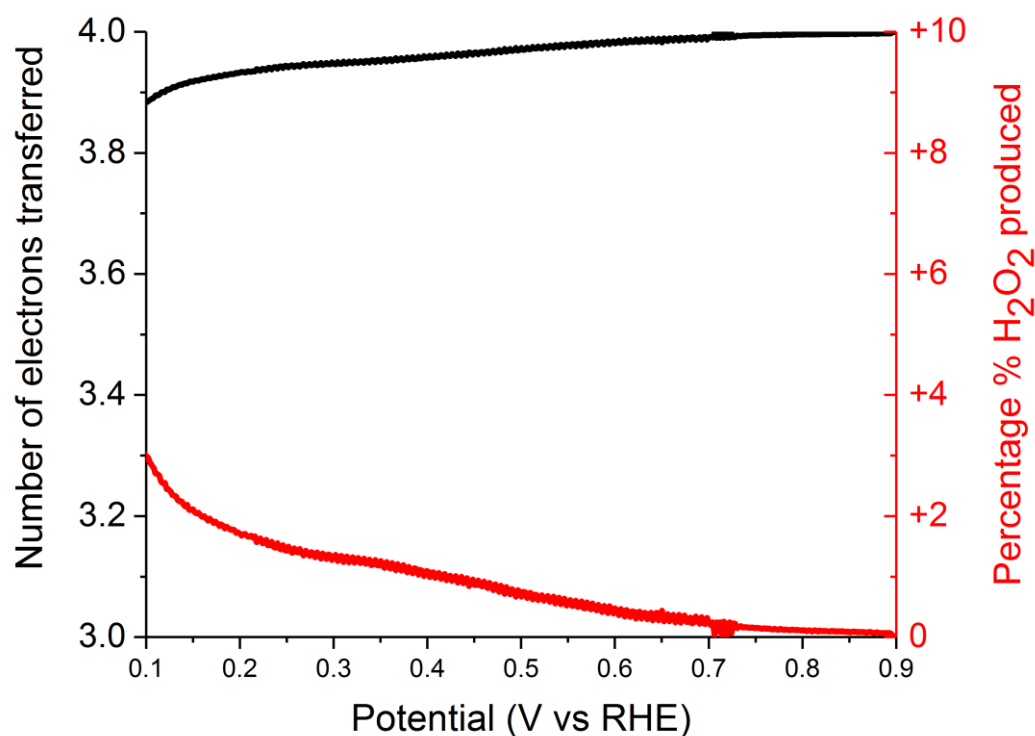

**Figure S7** Number of electrons transferred and H<sub>2</sub>O<sub>2</sub> yield calculated from Figure S6.

**Summary of Department of Energy Accelerated Stress Test Protocols:** The US Department of Energy has set out protocols and targets for accelerated stress tests of platinum catalyst layers in membrane electrode assemblies, tested as part of a working fuel cell<sup>1</sup>. For testing the normal operating conditions of the fuel cell, the DoE protocol uses cyclic voltammograms scanned between 0.6-0.95 V<sub>RHE</sub> for 30,000 cycles. To simulate the start-up and shut down of a fuel cell the test is modified to run between 1-1.5 V<sub>RHE</sub> for 5000 cycles. However, for rotating disk electrode experiments, it has been found that to reliably reproduce trends in durability seen in full fuel cell stack tests, it is necessary to cycle between 1-1.6 V<sub>RHE</sub>.<sup>2</sup> The accelerated stress tests performed in this work were run for 30,000 cycles in both cases. This is consistent with standard DoE protocol for the 0.6-1 V<sub>RHE</sub> test, and go beyond the cycling requirements of the 1-1.6 V<sub>RHE</sub> protocol.

|           | Catalyst                   | Electrolyte                          | AST protocol                                          | AST length    | Stability                                                                    | Pt/C Stability                                         |
|-----------|----------------------------|--------------------------------------|-------------------------------------------------------|---------------|------------------------------------------------------------------------------|--------------------------------------------------------|
| This work | GD-Pt/G                    | 0.1 M HClO <sub>4</sub>              | 0.6-1 V vs RHE, 100 mV/s                              | 30,000 cycles | 21 % in ECSA                                                                 | 30 % loss in ECSA                                      |
|           |                            |                                      | 1-1.6 V vs RHE, 100 mV/s                              | 30,000 cycles | 19 % loss in ECSA                                                            | 50 % loss in ECSA                                      |
| 3         | Pt/functionalised graphene | 0.5M H <sub>2</sub> SO <sub>4</sub>  | 0.6 - 1V vs RHE, 50 mV/s                              | 5000 cycles   | 37.6 % loss in ECSA                                                          | 60 % loss in ECSA                                      |
| 4         | FePt/rGO                   | 0.1 M HClO <sub>4</sub>              | 0.4 - 0.8 V vs Ag/AgCl, 100 mV/s                      | 10,000 cycles | Almost no change in ORR activity                                             | "Left shifted"                                         |
| 5         | Ru/N-doped graphene        | 0.1 M HClO <sub>4</sub>              | 0.6 - 1V vs RHE, 100mV/s                              | 10,000 cycles | 7 % decrease in limiting current, 18mV negative shift in half-wave potential | N.A.                                                   |
|           |                            |                                      | Chronoamperometric measurement at 0.7V vs RHE         | 10,000 s      | 10 % loss in current density at 0.7V vs RHE                                  | 38 % loss in current density at 0.7 V vs RHE           |
| 6         | Au cluster/rGO             | 0.1 M KOH                            | Chronoamperometric measurement at -0.2 V vs Ag/AgCl   | 40,000 s      | 16% loss in current density at -0.2 V vs Ag/AgCl                             | 50 % loss in current density at -0.2 V vs Ag/AgCl      |
| 7         | Ag nanocrystals/ rGO       | 0.1 M KOH                            | Potential window not specified, 50 mV/s               | 1000 cycles   | 15.6 % loss in ECSA                                                          | 63.1 % loss in ECSA                                    |
| 8         | Pd/rGO                     | 0.1 M KOH                            | Chronoamperometric measurement at 0.63 V vs RHE       | 2000 s        | ca. 93 % loss in current density at 0.63 V vs RHE                            | ca. 98 % loss in mass current density at 0.63 V vs RHE |
|           |                            |                                      | 0.36 - 0.86 V vs RHE                                  | 4000 cycles   | "little change in the ORR activity was observed"                             | N.A.                                                   |
| 9         | Pt/N-doped rGO             | 0.5 M H <sub>2</sub> SO <sub>4</sub> | 0.6 - 1.2 V vs RHE                                    | 4000 cycles   | 29.4 % loss in ECSA                                                          | 80.8 % loss in ECSA                                    |
| 10        | PtPd NPs/ rGO              | 0.1 M HClO <sub>4</sub>              | Chronoamperometric measurement at 0.1 V vs RHE        | 10,000 s      | ca. 24 % loss in current density at 0.1 V vs RHE                             | ca. 48 % loss in current density at 0.1 V vs RHE       |
| 11        | Pt/GO nanoribbons          | 0.1 M HClO <sub>4</sub>              | 0.6 - 1 V vs RHE, 50 mV/s                             | 10,000 cycles | 65 % loss in ECSA                                                            | N.A.                                                   |
| 12        | PtPd nanocage/rGO          | 0.1 M HClO <sub>4</sub>              | 0.6 - 1.05 V vs RHE, 50 mV/s                          | 10,000 cycles | 11.3 % loss in ECSA                                                          | N.A.                                                   |
| 13        | Cu-Pd/ rGO                 | 0.1 M KOH                            | Neither potential window nor scan speed not specified | 3000 cycles   | 8.8 % decrease in ORR limiting current                                       | 15.6 % decrease in ORR limiting current                |



|    |                                                        |                                         |                                                             |                  |                                                         |                                                                              |
|----|--------------------------------------------------------|-----------------------------------------|-------------------------------------------------------------|------------------|---------------------------------------------------------|------------------------------------------------------------------------------|
| 14 | Au clusters/<br>rGO                                    | 0.1 M KOH                               | -1 -0.2 V vs Ag/AgCl, 5<br>mV/s                             | 1000 cycles      | 16 % loss in<br>ECSA                                    | 27 % loss in<br>ECSA                                                         |
| 15 | PtNi/rGO                                               | 0.5 M<br>H <sub>2</sub> SO <sub>4</sub> | -0.2 - 1.2 V vs RHE, 50<br>mV/s                             | 2000 cycles      | 96.6 % loss in<br>ECSA                                  | N.A.                                                                         |
| 16 | PdPt@Pt/rGO                                            | 0.5 M<br>H <sub>2</sub> SO <sub>4</sub> | Neither potential<br>window nor scan speed<br>not specified | 1000 cycles      | 40 % loss in<br>ECSA                                    | N.A.                                                                         |
| 17 | Pt/ carbon<br>nanosheets                               | 0.1 M<br>HClO <sub>4</sub>              | 0.46-0.96V vs RHE, 50<br>mV/s                               | 5000 cycles      | 25 mV<br>negative shift<br>of half wave<br>potential    | 36 mV<br>negative shift<br>of half wave<br>potential                         |
| 18 | Au@Pt/rGO                                              | 0.1 M<br>HClO <sub>4</sub>              | N.A. (single cell tests,<br>no RDE ASTs)                    | N.A.             | N.A.                                                    | N.A.                                                                         |
| 19 | Pt/N-doped GO                                          | 0.1 M<br>HClO <sub>4</sub>              | No durability tests                                         | N.A.             | N.A.                                                    | N.A.                                                                         |
| 20 | Graphene<br>capped Pt                                  | 0.1 M<br>H <sub>2</sub> SO <sub>4</sub> | 0.4-0.75 V vs Ag/AgCl,<br>scan rate not specified           | 1000 cycles      | No change in<br>ECSA after<br>1000 cycles               | N.A. Pt<br>monolayer<br>they grew<br>themselves:<br>ca. 45 % loss in<br>ECSA |
| 21 | Pt/rGO/Carbon<br>black                                 | 0.1 M<br>HClO <sub>4</sub>              | 0.6- 1.1 V vs RHE, scan<br>rate not specified               | 20,000<br>cycles | 5 % loss in<br>ECSA                                     | 51 % loss in<br>ECSA                                                         |
| 22 | Pt/Graphene<br>nanoplatelets                           | 1 M H <sub>2</sub> SO <sub>4</sub>      | Chronoamperometric<br>measurement at 1.2 V<br>vs RHE        | 86,4000 s        | 35.4 % loss in<br>current<br>density                    | N.A.                                                                         |
| 23 | FeNi/ N-doped<br>rGO                                   | 0.5 M<br>H <sub>2</sub> SO <sub>4</sub> | -0.2 – 1 V vs Ag/AgCl,<br>50 mV/s                           | 1000 cycles      | CVs shown<br>but ECSA<br>change not<br>quantified       | Bigger change<br>in ECSA than<br>for Pt/N-doped<br>rGO                       |
| 24 | Co <sub>3</sub> O <sub>4</sub><br>nanocrystals/<br>rGO | 1 M KOH                                 | Chronoamperometric<br>measurement at 0.7 V<br>vs RHE        | 25,000 s         | 0 % loss in<br>current<br>density at 0.7<br>V vs RHE    | 35 % loss in<br>current density<br>at 0.7 V vs RHE                           |
| 25 | Pt/SiC/rGO                                             | 0.1 M<br>HClO <sub>4</sub>              | 0.6-1.2 V vs RHE, scan<br>rate not specified                | 10,000<br>cycles | 59.7 % loss in<br>ECSA                                  | 79.3 % loss in<br>ECSA                                                       |
| 26 | Pt/rGO/carbon<br>fiber                                 | 0.5 M<br>H <sub>2</sub> SO <sub>4</sub> | -0.2-0.96 V vs SCE, 50<br>mV/s                              | 1500 cycles      | 81.9 % loss in<br>ECSA                                  | 86.4 % loss in<br>ECSA                                                       |
| 27 | Pt/rGO                                                 | 0.1 M<br>HClO <sub>4</sub>              | 0-1.2 V vs RHE, scan<br>rate not specified                  | 10,000<br>cycles | 68 % loss in<br>ECSA                                    | N.A.                                                                         |
| 28 | Pd/N-carbon<br>nanosheet                               | 0.1 M KOH                               | Chronoamperometric<br>measuerment at 0.6 V<br>vs RHE        | 35,000 s         | 20 % loss in<br>current<br>density at 0.6<br>V vs RHE   | 33 % loss in<br>current density<br>at 0.6 V vs RHE                           |
| 29 | Cu/N-rGO                                               | 0.1 M KOH                               | Chronoamperometric<br>measurement at 0.7 V<br>vs RHE        | 1200s            | Ca. 0% loss in<br>current<br>density at 0.7<br>V vs RHE | Ca. 50 % loss in<br>current density<br>at 0.7V vs RHE                        |

|    |                                                                        |                                      |                                                         |                                       |                                                             |                                                             |
|----|------------------------------------------------------------------------|--------------------------------------|---------------------------------------------------------|---------------------------------------|-------------------------------------------------------------|-------------------------------------------------------------|
| 30 | Rh/rGO                                                                 | 0.1 M KOH                            | Chronoamperometric measurement at unspecified potential | 25,000s                               | 10.9 % loss in current density                              | 47.5 % loss in current density                              |
| 31 | Fe@PANI/rGO                                                            | 0.1 M KOH                            | 0.2 – 1.2 V vs RHE, 50 mV/s                             | 10,000 cycles                         | 13 mV decrease in $E_{1/2}$                                 | 82 mV decrease in $E_{1/2}$                                 |
| 32 | Pt/N-rGO + carbon nanospheres                                          | 0.1 M HClO <sub>4</sub>              | 0.5 – 1 V vs RHE, scan rate not specified               | 5000 cycles                           | 6% loss in ECSA                                             | 40.2 % loss in ECSA                                         |
| 33 | Pt/N-doped TiO <sub>2</sub> + N-doped rGO                              | 0.5 M H <sub>2</sub> SO <sub>4</sub> | 1 - 1.5 V vs RHE, 500 mV/s scan rate                    | 20,000 cycles                         | 16.9% loss in ECSA                                          | 40.1% loss in ECSA                                          |
| 34 | Ti/Pt-Pd/ Graphene nanoribbons                                         | 0.1 M HClO <sub>4</sub>              | 0.4 – 1.0 V vs RHE, 1 V/s                               | 10,800 cycles                         | ECSA “does not vary”                                        | 6 % loss in ECSA                                            |
|    |                                                                        |                                      | 1 – 1.5 V vs RHE, 500 mV/s                              | 5000 cycles                           | 9.7 % loss in ECSA                                          | N.A.                                                        |
| 35 | Pt/coiled carbon nanosheets                                            | 0.5 M H <sub>2</sub> SO <sub>4</sub> | Chronoamperometric measurement at 0.68 V vs RHE         | 3500 s                                | Ca. 85% loss in current density measured at 0.68 V vs RHE   | Ca. 100% loss in current density measured at 0.68 V vs RHE  |
| 36 | Pt@MoS <sub>2</sub> /N-rGO                                             | 0.5 M H <sub>2</sub> SO <sub>4</sub> | 0.6 – 1.0 V vs RHE, 100 mV/s                            | 30,000 cycles                         | 23.06 % loss in ECSA                                        | 28.02 % loss in ECSA                                        |
| 37 | Pt single atoms/rGO                                                    | 0.1 M KOH                            | 0.4 – 1.0 V vs RHE, 50 mV/s                             | 2000 cycles                           | 0.025 V negative shift in $E_{1/2}$                         | N.A.                                                        |
| 38 | Pt/ graphene-like 3D carbon                                            | 0.5 M H <sub>2</sub> SO <sub>4</sub> | Chronopotentiometry at -3.016 mA/cm <sup>2</sup>        | 7200 s                                | 10 % decrease in mass activity at 0.8 V vs RHE              | 39.2 % decrease in mass activity at 0.8 V vs RHE            |
| 39 | Pt/graphene                                                            | 0.1 M HClO <sub>4</sub>              | 0.6 - 1 V, 100 mV/s, followed by 0.6 – 1.5 V,           | 18,000 cycles, followed by 800 cycles | 5% loss in ECSA, followed by a further 20% loss             | 40% loss in ECSA followed by a further 22% loss             |
| 40 | Ag/N-doped graphene                                                    | 0.1 M HClO <sub>4</sub>              | -0.1 – 1 V, 50 mV/s                                     | 10,000 cycles                         | 22 mV negative shift in $E_{1/2}$                           | 86 mV negative shift in $E_{1/2}$                           |
| 41 | Pt/ N-doped rGO foam                                                   | 0.5 M H <sub>2</sub> SO <sub>4</sub> | Chronoamperometric measurement at 0.6 V vs RHE          | 30,000 s                              | 14.4 % decrease in current density measured at 0.6 V vs RHE | 33.1 % decrease in current density measured at 0.6 V vs RHE |
|    |                                                                        |                                      | 0.05 – 1.2 V vs RHE, 50 mV/s                            | 10,000 cycles                         | 24 mV negative shift in $E_{1/2}$                           | 75 mV negative shift in $E_{1/2}$                           |
| 42 | Ag <sub>4</sub> Bi <sub>2</sub> O <sub>5</sub> /MnO <sub>x</sub> - rGO | 0.1 M KOH                            | Chronoamperometric measurement at 0.03 V vs Hg/HgO      | 10,800 s                              | 14 % decrease in current density                            | 42 % decrease in current density                            |

|    |                                                             |                                         |                                                            |                  | measured at<br>0.03 V vs<br>Hg/HgO                                             | measured at<br>0.03 V vs<br>Hg/HgO                                            |
|----|-------------------------------------------------------------|-----------------------------------------|------------------------------------------------------------|------------------|--------------------------------------------------------------------------------|-------------------------------------------------------------------------------|
| 43 | Cu/N-doped<br>rGO                                           | 0.1 M KOH                               | Chronoamperometric<br>measurement at 0.7 V<br>vs RHE       | 25,000 s         | 4 % decrease<br>in current<br>density<br>measured at<br>0.7 V vs RHE           | 19.5 %<br>decrease in<br>current density<br>measured at<br>0.7 V vs<br>RHE    |
| 44 | Pt/IrO <sub>2</sub> Nb <sub>2</sub> O <sub>5</sub> -<br>rGO | 0.5 M<br>H <sub>2</sub> SO <sub>4</sub> | 0.0 – 1.2 V vs RHE, 50<br>mV/s                             | 2000 cycles      | 23.8 % loss in<br>ECSA                                                         | 39.4 loss in<br>ECSA                                                          |
| 45 | Fe-doped<br>mayenite/rGO                                    | 0.1 M KOH                               | Chronoamperometric<br>measurement at 0.87 V<br>vs RHE      | 39,600 s         | Current<br>density<br>“almost<br>remains the<br>same”                          | 40 % decrease<br>in current<br>density<br>measured at<br>0.87 V vs RHE        |
| 46 | Pt-Pd-<br>Cu/graphene<br>nanoribbon                         | 0.1 M<br>HClO <sub>4</sub>              | 0.6 – 1 V vs RHE, 50<br>mV/s                               | 10,000<br>cycles | Ca. 30 %<br>decrease in<br>mass activity                                       | N.A.                                                                          |
| 47 | Mn doped<br>CeO <sub>2</sub> /rGO                           | 0.1 M KOH                               | Chronoamperometric<br>measurement at -0.35<br>V vs Ag/AgCl | 12,500<br>cycles | 20 % decrease<br>in current<br>density<br>measured at-<br>0.35 V vs<br>Ag/AgCl | 40% decrease<br>in current<br>density<br>measured at-<br>0.35 V vs<br>Ag/AgCl |
| 48 | Fe-N-CNT/rGO                                                | 0.1 M KOH                               | Chronoamperometric<br>measurement at 0.8 V<br>vs RHE       | 72,000 s         | 6 % decrease<br>in current<br>density<br>measured at<br>0.8 V vs RHE           | 29 % decrease<br>in current<br>density<br>measured at<br>0.8 V vs RHE         |
| 49 | Pt/B-rGO                                                    | 0.1 M KOH                               | 0.57 – 1.17 V vs RHE,<br>scan rate not specified           | 6000 cycles      | Onset and half<br>wave<br>potential<br>“close to<br>initial cycle”             | N.A.                                                                          |
| 50 | Pt/rGO + CNT<br>spacers                                     | 0.5 M<br>H <sub>2</sub> SO <sub>4</sub> | 0 – 1.2 V vs RHE, 50<br>mV/s                               | 2000 cycles      | 39 % loss in<br>ECSA                                                           | 19% loss in<br>ECSA                                                           |
| 51 | ZIF-N-rGO<br>porous<br>nanosheets                           | 0.1 M KOH                               | Chronoamperometric<br>measurement at -0.4 V<br>vs Ag/AgCl  | 28,000 s         | 6 % decrease<br>in current<br>density<br>measured at -<br>0.4 V vs<br>Ag/AgCl  | 20 % decrease<br>in ECSA<br>measured at -<br>0.4 V vs<br>Ag/AgCl              |
| 52 | Fe-N-C<br>microspheres                                      | 0.1 M KOH                               | 0.55 – 0.95 V vs RHE,<br>100 mV/s                          | 10,000<br>cycles | 29 mV<br>negative shift<br>in E <sub>1/2</sub>                                 | 31 mV<br>negative shift<br>in E <sub>1/2</sub>                                |

**Table S1** | To the best of our knowledge, a review of graphene supported catalysts for ORR, their associated accelerated stress test protocols and results.

| This work: GD-Pt/G      |                                                 |                                                   |                                          |                                |
|-------------------------|-------------------------------------------------|---------------------------------------------------|------------------------------------------|--------------------------------|
| 0.6 - 1V <sub>RHE</sub> |                                                 |                                                   |                                          |                                |
| Number of cycles        | Limiting current density (mA cm <sup>-2</sup> ) | Change in limiting current (mA cm <sup>-2</sup> ) | Half wave potential (mV <sub>RHE</sub> ) | Half wave potential shift (mV) |
| 0                       | 5.71                                            | 0                                                 | 894                                      | 0                              |
| 30,000                  | 5.58                                            | -0.13                                             | 876                                      | -18                            |
| 1 - 1.6V <sub>RHE</sub> |                                                 |                                                   |                                          |                                |
| 0                       | 5.23                                            | 0                                                 | 865                                      | 0                              |
| 30,000                  | 4.92                                            | -0.31                                             | 850                                      | -15                            |
| Commercial Pt/C         |                                                 |                                                   |                                          |                                |
| 0.6 - 1V <sub>RHE</sub> |                                                 |                                                   |                                          |                                |
| Number of cycles        | Limiting current density (mA cm <sup>-2</sup> ) | Change in limiting current (mA cm <sup>-2</sup> ) | Half wave potential (mV <sub>RHE</sub> ) | Half wave potential shift (mV) |
| 0                       | 5.84                                            | 0                                                 | 836                                      | 0                              |
| 30,000                  | 5.7                                             | -0.14                                             | 874                                      | 38                             |
| 1 - 1.6V <sub>RHE</sub> |                                                 |                                                   |                                          |                                |
| 0                       | 6.06                                            | 0                                                 | 892                                      | 0                              |
| 30,000                  | 5.49                                            | -0.57                                             | 822                                      | -70                            |

**Table S2** | Limiting current density , half wave potential and relative changes after 30,000 cycles for both GD-Pt/G and the commercial Pt/C in the 0.6 – 1 V<sub>RHE</sub> and 1 - 1.6 V<sub>RHE</sub> potential ranges.

- 1 Fuel cell Technologies Office: Multi-year Research, Development and Demonstration Plan, [https://www.energy.gov/sites/prod/files/2017/05/f34/fcto\\_myrrdd\\_fuel\\_cells.pdf](https://www.energy.gov/sites/prod/files/2017/05/f34/fcto_myrrdd_fuel_cells.pdf), (accessed 18 January 2019).
- 2 A. Riese, D. Banham, S. Ye and X. Sun, *J. Electrochem. Soc.*, 2015, **162**, F783–F788.
- 3 R. Kou, Y. Shao, D. Wang, M. H. Engelhard, J. H. Kwak, J. Wang, V. V. Viswanathan, C. Wang, Y. Lin, Y. Wang, I. A. Aksay and J. Liu, *Electrochem. commun.*, 2009, **11**, 954–957.
- 4 S. Guo and S. Sun, *J. Am. Chem. Soc.*, 2012, **134**, 2492–2495.
- 5 C. Zhang, J. Sha, H. Fei, M. Liu, S. Yazdi, J. Zhang, Q. Zhong, X. Zou, N. Zhao, H. Yu, Z. Jiang, E. Ringe, B. I. Yakobson, J. Dong, D. Chen and J. M. Tour, *ACS Nano*, 2017, **11**, 6930–6941.
- 6 H. Yin, H. Tang, D. Wang, Y. Gao and Z. Tang, *ACS Nano*, 2012, **6**, 8288–8297.
- 7 M. S. Ahmed, D.-W. Lee and Y.-B. Kim, *J. Electrochem. Soc.*, 2016, **163**, F1169–F1176.
- 8 Y.-X. Huang, J.-F. Xie, X. Zhang, L. Xiong and H.-Q. Yu, *ACS Appl. Mater. Interfaces*, 2014, **6**, 15795–15801.
- 9 D. He, Y. Jiang, H. Lv, M. Pan and S. Mu, *Appl. Catal. B Environ.*, 2013, **132–133**, 379–388.
- 10 L. Sun, H. Wang, K. Eid, S. M. Alshehri, V. Malgras, Y. Yamauchi and L. Wang, *Electrochim. Acta*, 2016, **188**, 845–851.
- 11 G. V. Fortunato, F. De Lima and G. Maia, *J. Power Sources*, 2016, **302**, 247–258.
- 12 S. Bai, C. Wang, W. Jiang, N. Du, J. Li, J. Du, R. Long, Z. Li and Y. Xiong, *Nano*

- Res.*, 2015, **8**, 2789–2799.
- 13 Y. Zheng, S. Zhao, S. Liu, H. Yin, Y. Y. Chen, J. Bao, M. Han and Z. Dai, *ACS Appl. Mater. Interfaces*, 2015, **7**, 5347–5357.
  - 14 S. Xu and P. Wu, *J. Mater. Chem. A*, 2014, **2**, 13682–13690.
  - 15 W. kyo Suh, P. Ganesan, B. Son, H. Kim and S. Shanmugam, *Int. J. Hydrogen Energy*, 2016, **41**, 12983–12994.
  - 16 S. S. Li, J. J. Lv, L. N. Teng, A. J. Wang, J. R. Chen and J. J. Feng, *ACS Appl. Mater. Interfaces*, 2014, **6**, 10549–10555.
  - 17 L. Zeng, X. Cui and J. Shi, *Sci. China Mater.*, 2018, 1–10.
  - 18 N. Seselj, C. Engelbrekt, Y. Ding, H. A. Hjuler and J. Ulstrup, *Adv. Energy Mater.*, 2018, **1702609**, 1–12.
  - 19 zoltan konya Tamas Varga, Agnes Timea Varga, Gergo Ballai, Henrik haspel, Akos Kukovecz, *Carbon N. Y.*, 2018, **133**, 90–100.
  - 20 A. Abdelhafiz, A. Vitale and P. Buntin, *Energy Environ. Sci.*, 2018, **11**, 1610–1616.
  - 21 Y. Y. Li, Y. Y. Li, E. Zhu, T. McLouth, C. Y. Chiu, X. Huang and Y. Huang, *J. Am. Chem. Soc.*, 2012, **134**, 12326–12329.
  - 22 E. Daş, S. Alkan Gürsel, L. Işikel Şanlı and A. Bayrakçeken Yurtcan, *Int. J. Hydrogen Energy*, 2017, **42**, 19246–19256.
  - 23 N. A. M. Barakat, A. G. El-Deen, Z. K. Ghouri and S. Al-Meer, *Sci. Rep.*, 2018, **8**, 1–11.
  - 24 Y. Liang, Y. Li, H. Wang, J. Zhou, J. Wang, T. Regier and H. Dai, *Nat. Mater.*, 2011, **10**, 780–786.
  - 25 X. Chen, D. He, H. Wu, X. Zhao, J. Zhang, K. Cheng, P. Wu and S. Mu, *Sci. Rep.*, 2015, **5**, 1–10.
  - 26 X. Mu, Z. Xu, Y. Ma, Y. Xie, H. Mi and J. Ma, *Electrochim. Acta*, 2017, **253**, 171–177.
  - 27 P. Zhang, W. Tu, R. Wang, S. Cai, J. Wu, Q. Yan, H. Pan, H. Zhang and H. Tang, *Int. J. Electrochem. Sci.*, 2016, **11**, 10763–10778.
  - 28 S. Zhang, L. Wang, L. Fang, Y. Tian, Y. Tang, X. Niu, Y. Hao and Z. Li, *J. Electrochem. Soc.*, 2020, **167**, 054508.
  - 29 X. Wen, H. Qi, Y. Cheng, Q. Zhang, C. Hou and J. Guan, *Chinese J. Chem.*, 2020, cjoc.202000073.
  - 30 M. Sookhakian, G. B. Tong and Y. Alias, *Appl. Organomet. Chem.*, 2020, **34**, 1–11.
  - 31 M. S. Ahmed, H. Begum and Y. B. Kim, *J. Power Sources*, 2020, **451**, 227733.
  - 32 Y. Xiong, M. You, F. Liu, M. Wu, C. Cai, L. Ding, C. Zhou, M. Hu, W. Deng and S. Wang, *ACS Appl. Energy Mater.*, 2020, **3**, 2490–2495.
  - 33 C. Park, E. Lee, G. Lee and Y. Tak, *Appl. Catal. B Environ.*, 2020, **268**, 118414.
  - 34 G. V. Fortunato, E. S. F. Cardoso, B. K. Martini and G. Maia, *ChemElectroChem*, 2020, **7**, 1610–1618.
  - 35 Z. Tong, M. Wen, C. Lv, Q. Zhang, Y. Yin, X. Liu, Y. Li, C. Liao, Z. Wu and D. D. Dionysiou, *Appl. Catal. B Environ.*, 2020, **269**, 118764.
  - 36 S. Ramakrishnan, M. Karuppannan, M. Vinothkannan, K. Ramachandran, O. J. Kwon and D. J. Yoo, *ACS Appl. Mater. Interfaces*, 2019, **11**, 12504–12515.
  - 37 X. Song, N. Li, H. Zhang, H. Wang, L. Wang and Z. Bian, *J. Power Sources*, 2019, **435**, 226771.
  - 38 Y. Kim, D. Lee, Y. Kwon, T. W. Kim, K. Kim and H. J. Kim, *J. Electroanal. Chem.*, 2019, **838**, 89–93.
  - 39 E. Bertin, A. Münzer, S. Reichenberger, R. Streubel, T. Vinnay, H. Wiggers, C. Schulz, S. Barcikowski and G. Marzun, *Appl. Surf. Sci.*, 2019, **467–468**, 1181–1186.
  - 40 Y. Yan, S. Yan, Z. Yu and Z. Zou, *ChemCatChem*, 2019, **11**, 1033–1038.

- 41 K. K. Karuppanan, A. V. Raghu, M. K. Panthalingal, V. Thiruvenkatam, P. Karthikeyan and B. Pullithadathil, *Sustain. Energy Fuels*, 2019, **3**, 996–1011.
- 42 J. Wang, J. Pan, X. Zeng, G. Tang, J. Cai, A. Khan, Y. Sun and X. Liu, *J. Solid State Electrochem.*, 2019, **23**, 2737–2746.
- 43 L. Bai, C. Hou, X. Wen and J. Guan, *ACS Appl. Energy Mater.*, 2019, **2**, 4755–4762.
- 44 F. D. Kong, L. J. Yang, J. Liu, A. X. Ling, M. J. Shi, M. Lv, Z. Q. Xu, Y. L. Niu and H. Y. Wang, *Catal. Letters*, 2019, **149**, 3041–3047.
- 45 K. Khan, A. K. Tareen, M. Aslam, S. Ali Khan, Q. Khan, Q. U. Khan, M. Saeed, A. Siddique Saleemi, M. Kiani, Z. Ouyang, H. Zhang and Z. Guo, *Sci. Rep.*, 2019, **9**, 1–11.
- 46 C. V. Boone and G. Maia, *Electrochim. Acta*, 2019, **303**, 192–203.
- 47 I. Hota, S. Soren, B. D. Mohapatra, A. K. Debnath, K. P. Muthe, K. S. K. Varadwaj and P. Parhi, *J. Electroanal. Chem.*, 2019, **851**, 113480.
- 48 Y. Zheng, F. He, J. Wu, D. Ma, H. Fan, S. Zhu, X. Li, Y. Lu, Q. Liu and X. Hu, *ACS Appl. Nano Mater.*, 2019, **2**, 3538–3547.
- 49 D. Lim, Y. Shim, J. Oh, S. Kim and S. Park, *J. Solid State Chem.*, 2019, **271**, 168–174.
- 50 Z. Liu, A. A. Abdelhafiz, Y. Jiang, C. Qu, I. Chang, J. Zeng, S. Liao and F. M. Alamgir, *Mater. Chem. Phys.*, 2019, **225**, 371–378.
- 51 H. X. Zhong, J. Wang, Y. W. Zhang, W. L. Xu, W. Xing, D. Xu, Y. F. Zhang and X. B. Zhang, *Angew. Chemie - Int. Ed.*, 2014, **53**, 14235–14239.
- 52 F. L. Meng, Z. L. Wang, H. X. Zhong, J. Wang, J. M. Yan and X. B. Zhang, *Adv. Mater.*, 2016, **28**, 7948–7955.
